# Supplementary material
Source: Elsevier journal article supplement (https://www.sciencedirect.com/science/article/pii/S0213911118301833)
Supplement: mmc1 [file S0213911118301833:mmc1.docx]

**Appendix**

**Survey on Masters in Health Economics and Employment**

*Required.

**Gender***


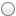
  Male


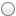
  Female

**Date of birth***

DD/MM/YY

**What year did you finish your master's degree in Health Economics and/or Public Health?***

(If you have done more than one master, the last one)

YYYY

**Institution where you did the master***


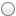
  University of Barcelona (GSE)


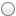
  University of Cantabria


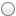
  University of Carlos III


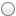
  University of Castilla la Mancha


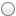
  University of Málaga


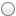
  University of Pablo Olavide


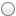
  University Pompeu Fabra


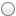
  Foundation Gaspar Casal


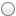
  Foundation Universitat y Empresa


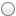
  Andalusian School of Public Health - Public Health -


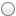
  Andalusian School of Public Health - Health Economics and Management of Health Organizations


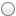
  Andalusian School of Public Health – Erasmus Mundus EuropubHealth


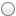
  Max Weber Institute


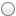
  Other

**What was your grade of training when you accessed to the master?**

(If you have more than one degree, indicate which one you consider most relevant)


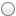
  Law


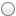
  Economics, Business Administration and Management, etc


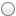
  Nursing


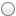
  Pharmacy


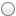
  Medicine


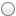
  Other academic degrees in health


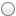
  Other academic degrees in social studies

**Have you studied any kind of previous training in Health Economics?***


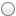
  Yes


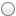
  No

**Before accessing the master's degree in Health Economics / or Public Health I had the academic level of…***


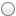
  University studies (grade or similar)


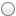
  Master


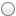
  PhD studies


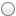
  PhD studies and Master

**What was your principal motivation to train in Health Economics?***

(Indicate only one)


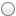
  To acquire new knowledge


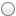
  To enhance previous knowledge


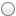
  To research, academic objectives


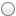
  To improve the curriculum


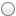
  To improve their employment opportunities


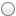
  To get promoted from their current position


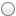
  Curiosity


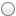
  Other:

**How did you finance your studies?***


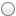
  Totally personal funded


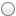
  Partially funded by a private company


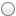
  Totally funded by a private company


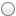
  Partially funded by a public company


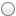
  Totally funded by a public company

**Your employment situation at the time of starting the master was…***

(When you enrolled or started the course)


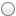
  Unemployed, but not looking for a job


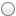
  Unemployed and looking for a job


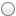
  Employed


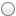
  Employed looking for a promotion from my job


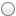
  Employed looking to improve my education


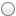
  Employed looking to change my job


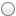
  Scholarship researcher

**Did you think that doing the master was going to help you improve your working situation?***

(For improving your employability, for promotion, for greater efficiency…)


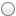
  Yes


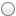
  No

**Have you done any kind of internship linked to the master?***


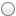
  Yes


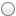
  No

**After finishing the master, have you obtained any employment in the field of Health Economics and / or Public Health?***

(If you have clearly applied the acquired knowledge)


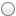
  Yes


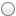
  No

**What was your profession when starting the master?***

(Only principal profession)


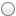
  Academic


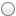
  Student


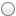
  A job in a non-health related field


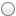
  Pharmaceutical industry


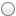
  A job in a private company related to health


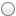
  A job in a public company related to health


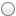
  Other

**To do the master was helpful to get a job in Health Economics and/or Public Health?***

(Not in any other area)


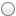
  No, I have not got a job in this field


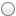
  No, but because I have never looked for a job in this field


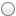
  No, but because I was already working in this field


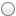
  Yes

Principio del formulario

**Only if you found a job after finishing the master**

**What do you think has helped you find the job?***

(Only if the job is related to the Health Economics)


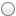
  The training that I received, my Curriculum Vitae


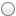
  Contacts with other fellows


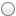
  Personal contacts


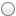
  Contacts with professors


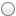
  Other

**Only if the answer has been affirmative, how long did it take you to get a job? (in years)***

(Indicate 1 if it was in the same year, 2 if it was the next ...)

XX

**Only if the answer has been affirmative, what were your monthly income?***


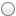
  Less than 500 €


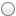
 Between 500 € and 1,000€


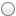
 Between more than 1,000 € and 1,500 €


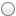
  Between more than 1,500 € and 2,000 €


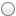
  Between more than 2,000 € and 2,500 €


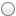
  More than 2,500 €

**Only if the answer has been affirmative, how long was your contract?***


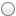
  Between 1 and 3 months


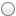
 Between more than 3 and 6 months


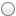
 Between more than 6 and 12 months


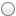
  More than 12 months


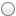
  Permanent


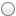
  For a specific Project


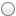
  Freelance

**Evaluation of training**

**In general, how do you evaluate the training you received?***

|  | 1 | 2 | 3 | 4 | 5 | 6 | 7 | 8 | 9 | 10 |  |
| --- | --- | --- | --- | --- | --- | --- | --- | --- | --- | --- | --- |
| Very bad | 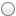 | 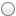 | 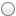 | 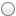 | 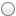 | 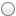 | 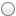 | 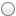 | 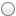 | 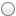 | Very good |

**How do you value that the training was multidisciplinary instead of specific in one field?***

(Only on management, economic, health, social ...)

|  | 1 | 2 | 3 | 4 | 5 | 6 | 7 | 8 | 9 | 10 |  |
| --- | --- | --- | --- | --- | --- | --- | --- | --- | --- | --- | --- |
| Very bad | 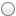 | 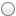 | 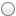 | 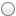 | 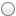 | 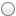 |  |  |  |  | Very good |

**Do you consider that the training received was applicable?***

|  | 1 | 2 | 3 | 4 | 5 | 6 | 7 | 8 | 9 | 10 |  |
| --- | --- | --- | --- | --- | --- | --- | --- | --- | --- | --- | --- |
| Very little |  |  |  |  |  |  |  |  |  |  | Very much |

**What type of subject do you consider most useful?***

(Choose the most relevant)

 Data analysis

 Epidemiology

 Research methodology

 Economics

 Health management

 Law

 Health

 Social

 Other

**Do you think the training received is useful to find or improve employability?***

|  | 1 | 2 | 3 | 4 | 5 | 6 | 7 | 8 | 9 | 10 |  |
| --- | --- | --- | --- | --- | --- | --- | --- | --- | --- | --- | --- |
| For nothing at all |  |  |  |  |  |  |  |  |  |  | A lot |

**How have you applied the acquired knowledge?***

(Choose only one)

 Nothing at all

 To research

 Doctoral thesis

 To improve in my job

**Your current working situation is…***

 Unemployed, but not looking for a job

 Unemployed and looking for a job

 Employed

 Employed looking for a promotion from their job

 Employed looking to improve their education

 Employed looking to change their job

 Scholarship researcher

**What is your current professional dedication?***

(Choose your main dedication)

 Academic

 Student

 A job in a non-health related field

 Pharmaceutical industry

 A job in a private company related to health

  A job in a public company related to health

  Other

**Do you maintain contact with colleagues of the master for working reasons?***

 Yes

 No

**Do you maintain contact with colleagues of the master for social reasons?***

 Yes

 No

**Do you want to make some other comments?**

Final del formulario

Final del formulario

Final del formulario
